# Supplementary material for: Focus on the overlap density of wavefunctions inGWapproximations
Source: Royal Society of Chemistry journal article supplement (doi:10.1039/c9cp06862g), 2020-01-01
Supplement: c9cp06862g1.pdf [file c9cp06862g1.pdf]

# Electronic supplementary information (ESI): Focus on the overlap density of wavefunctions in *GW* approximations

Koshi Okamura\*

*Ronin Institute, Montclair, New Jersey 07043, USA*

E-mail: koshi.okamura@ronininstitute.org

## S1 PAW datasets

PAW<sup>GS</sup> and PAW<sup>QP</sup> are listed in Table S1. PAW<sup>GS</sup> is a slight modification to the JTH atomic datasets library v1.0 provided with ABINIT code, and PAW<sup>QP</sup> is an extension to PAW<sup>GS</sup> with additional sets of partial waves and projector function.

## S2 Character tables of space group #221

The character tables of the symmorphic space group #221 at high symmetry points and along symmetry axes are summarized in Tables S2-S9. Point group operations  $\{R_\alpha\}$  are described in the Hermann-Mauguin notation. The irreducible representations in the first, second, and third column are given in the notations of the Bilbao Crystallographic Server (Bilbao),<sup>S1,S2</sup> Bouckaert-Smoluchowski-Wigner (BSW),<sup>S3</sup> and point group (PG),<sup>S4</sup> respectively.

### S3 Representation of an atomic orbital

An atomic orbital has the representation of the full rotation group  $\Gamma^{\text{atom}}$ . The character  $\chi^{\text{atom}}$  for an angular quantum number  $l$  and for either proper rotations  $\{\alpha\}$  or improper rotations  $\{\bar{\alpha}\}$  is described as

$$\begin{aligned}\chi_l^{\text{atom}}\{\alpha\} &= \frac{\sin(l + \frac{1}{2})\alpha}{\sin \frac{1}{2}\alpha} \\ \chi_l^{\text{atom}}\{\bar{\alpha}\} &= (-1)^l \frac{\sin(l + \frac{1}{2})\alpha}{\sin \frac{1}{2}\alpha}\end{aligned}\quad (\text{S1})$$

The  $\Gamma^{\text{atom}}$ 's of s, p, and d orbitals for the groups of the wavevector at high symmetry points are summarized in Tables S10-S13 and decomposed into the irreducible representations. This procedure is based on ref. S5.

### S4 Character of an equivalence representation

The character  $\chi^{\text{equiv}}$  of an equivalence representation  $\Gamma^{\text{equiv}}$  for a space group operation  $\{R_\alpha|\mathbf{R}_n\}$  is expressed by the trace of a matrix representation as

$$\chi^{\text{equiv}}\{R_\alpha|\mathbf{R}_n\} = \text{tr}\langle f_{\mathbf{k}}|\{R_\alpha|\mathbf{R}_n\}f_{\mathbf{k}}\rangle \quad (\text{S2})$$

where  $f_{\mathbf{k}}(\mathbf{r})$  is written in the form of a Bloch function with a cell-periodic function  $g_{\mathbf{k}}(\mathbf{r})$  as

$$f_{\mathbf{k}}(\mathbf{r}) = e^{i\mathbf{k}\cdot\mathbf{r}}g_{\mathbf{k}}(\mathbf{r}) \quad (\text{S3})$$

Here,  $\mathbf{k} \cdot R_\alpha^{-1}\mathbf{r} = R_\alpha\mathbf{k} \cdot \mathbf{r}$  and  $R_\alpha\mathbf{k} = \mathbf{k} + \mathbf{K}_\alpha$ , where  $\mathbf{K}_\alpha$  is a reciprocal lattice vector, and

$$\{R_\alpha|\mathbf{R}_n\}f_{\mathbf{k}}(\mathbf{r}) = e^{i\mathbf{k}\cdot\mathbf{R}_n}e^{i(\mathbf{k}+\mathbf{K}_\alpha)\cdot\mathbf{r}}\{R_\alpha|\mathbf{R}_n\}g_{\mathbf{k}}(\mathbf{r}) \quad (\text{S4})$$

Eqn (S2) then results in

$$\chi^{\text{equiv}}\{R_\alpha|\mathbf{R}_n\} = e^{i\mathbf{k}\cdot\mathbf{R}_n} \text{tr}\langle g_{\mathbf{k}}|e^{i\mathbf{K}_\alpha\cdot\mathbf{r}}|\{R_\alpha|\mathbf{R}_n\}g_{\mathbf{k}}\rangle \quad (\text{S5})$$

Note that the phase factor  $e^{i\mathbf{k}\cdot\mathbf{R}_n}$  comes from the translation operation  $\{\mathbf{R}_n\}$ .

## S5 Equivalence representation of an atomic arrangement

An atomic arrangement is expressed by a Bloch function in the form of eqn (S3) with

$$g_{\mathbf{k}}(\mathbf{r}) = \sum_j \delta(\mathbf{r} - \mathbf{r}_j) \quad (\text{S6})$$

where  $\mathbf{r}_j$  is the position of atoms. Eqn (S5) then leads to

$$\chi^{\text{equiv}}\{R_\alpha|\mathbf{R}_n\} = e^{i\mathbf{k}\cdot\mathbf{R}_n} \sum_j e^{i\mathbf{K}_\alpha\cdot\mathbf{r}_j} \delta(\{R_\alpha^{-1}|\mathbf{R}_n\}\mathbf{r}_j - \mathbf{r}_j) \quad (\text{S7})$$

The  $\Gamma^{\text{equiv}}$ 's of Ti, Sr, and O<sub>3</sub> atoms for the groups of the wavevector at high symmetry points are summarized in Tables S14-S17 and decomposed into the irreducible representations.

## S6 Equivalence representation of a set of plane waves

Plane waves are sorted by  $|\mathbf{k}+\mathbf{G}|$  and a set of plane waves is expressed by a Bloch function in the form of eqn (S3) with

$$g_{\mathbf{k}}(\mathbf{r}) = \sum_j e^{i\mathbf{G}_j\cdot\mathbf{r}} \quad (\text{S8})$$

where  $\mathbf{G}_j$  is the reciprocal lattice vector. Here,  $\mathbf{G}_j \cdot R_\alpha^{-1}\mathbf{r} = R_\alpha\mathbf{G}_j \cdot \mathbf{r}$  and  $R_\alpha\mathbf{G}_j = \mathbf{G}_j + \mathbf{K}_{\alpha,j}$ , where  $\mathbf{K}_{\alpha,j}$  is a reciprocal lattice vector. Eqn (S5) then leads to

$$\chi^{\text{equiv}}\{R_\alpha|\mathbf{R}_n\} = e^{i\mathbf{k}\cdot\mathbf{R}_n} \sum_j \delta(\mathbf{K}_\alpha + \mathbf{K}_{\alpha,j}) \quad (\text{S9})$$

The  $\Gamma^{\text{equiv}}$ 's of sets of plane waves for the groups of the wavevector at high symmetry points are summarized in Tables S18-S21 and decomposed into the irreducible representations. These procedures in Sections S4-S6 are based partially on ref. S5.

Table S1: Description of PAW<sup>GS</sup> and PAW<sup>QP</sup> specifying the state, matching radius  $r_c$ , and reference energy  $E_{\text{ref}}$

| Atom | State | PAW <sup>GS</sup> |                            | PAW <sup>QP</sup> |                            |
|------|-------|-------------------|----------------------------|-------------------|----------------------------|
|      |       | $r_c$ ( $a_0$ )   | $E_{\text{ref}}$ ( $E_h$ ) | $r_c$ ( $a_0$ )   | $E_{\text{ref}}$ ( $E_h$ ) |
| Sr   | 4s    | 1.81              | -1.47                      | 1.81              | -1.47                      |
|      | 5s    | 1.81              | -0.13                      | 1.81              | -0.13                      |
|      | 5s    |                   |                            | 1.81              | 1.50                       |
|      | 4p    | 2.01              | -0.81                      | 2.01              | -0.81                      |
|      | 5p    | 2.01              | 1.00                       | 2.01              | 0.25                       |
|      | 5p    |                   |                            | 2.01              | 1.00                       |
|      | 5p    |                   |                            | 2.01              | 1.75                       |
|      | 4d    | 2.21              | -0.04                      | 2.21              | -0.04                      |
|      | 4d    |                   |                            | 2.21              | 1.00                       |
|      | 5d    | 2.21              | 1.50                       | 2.21              | 1.50                       |
| Ti   | 3s    | 2.30              | -2.17                      | 2.30              | -2.17                      |
|      | 4s    | 2.30              | -0.14                      | 2.30              | -0.14                      |
|      | 4s    |                   |                            | 2.30              | 1.50                       |
|      | 3p    | 2.11              | -1.31                      | 2.11              | -1.31                      |
|      | 4p    | 2.11              | 0.75                       | 2.11              | 0.00                       |
|      | 4p    |                   |                            | 2.11              | 1.00                       |
|      | 4p    |                   |                            | 2.11              | 1.50                       |
|      | 3d    | 2.11              | -0.08                      | 2.11              | -0.08                      |
|      | 4d    | 2.11              | 0.75                       | 2.11              | 0.75                       |
|      | 4d    |                   |                            | 2.11              | 1.50                       |
| O    | 4d    |                   |                            | 2.11              | 2.25                       |
|      | 2s    | 1.41              | -0.87                      | 1.41              | -0.87                      |
|      | 3s    | 1.41              | 1.00                       | 1.41              | 0.50                       |
|      | 3s    |                   |                            | 1.41              | 1.50                       |
|      | 2p    | 1.41              | -0.34                      | 1.41              | -0.34                      |
|      | 3p    | 1.41              | 1.00                       | 1.41              | 0.75                       |
|      | 3p    |                   |                            | 1.41              | 1.50                       |

Table S2: Character table for the group of the wavevector at the  $\Gamma$  point [ $\mathbf{k}_\Gamma = \frac{2\pi}{a}(0, 0, 0)$ ] of the space group #221, which transforms isomorphically to the point group  $m\bar{3}m$  ( $O_h$ )

| Bilbao       | BSW             | PG              | $1^a$ | $2^b$ | $2'^c$ | $3^d$ | $4^e$ | $\bar{1}^f$ | $m^g$ | $m'^h$ | $\bar{3}^i$ | $\bar{4}^j$ |
|--------------|-----------------|-----------------|-------|-------|--------|-------|-------|-------------|-------|--------|-------------|-------------|
| $\Gamma_1^+$ | $\Gamma_1^+$    | A <sub>1g</sub> | 1     | 1     | 1      | 1     | 1     | 1           | 1     | 1      | 1           | 1           |
| $\Gamma_1^-$ | $\Gamma_1^-$    | A <sub>1u</sub> | 1     | 1     | 1      | 1     | 1     | -1          | -1    | -1     | -1          | -1          |
| $\Gamma_2^+$ | $\Gamma_2^+$    | A <sub>2g</sub> | 1     | 1     | -1     | 1     | -1    | 1           | 1     | -1     | 1           | -1          |
| $\Gamma_2^-$ | $\Gamma_2^-$    | A <sub>2u</sub> | 1     | 1     | -1     | 1     | -1    | -1          | -1    | 1      | -1          | 1           |
| $\Gamma_3^+$ | $\Gamma_{12}^+$ | E <sub>g</sub>  | 2     | 2     | 0      | -1    | 0     | 2           | 2     | 0      | -1          | 0           |
| $\Gamma_3^-$ | $\Gamma_{12}^-$ | E <sub>u</sub>  | 2     | 2     | 0      | -1    | 0     | -2          | -2    | 0      | 1           | 0           |
| $\Gamma_4^+$ | $\Gamma_{15}^+$ | T <sub>1g</sub> | 3     | -1    | -1     | 0     | 1     | 3           | -1    | -1     | 0           | 1           |
| $\Gamma_4^-$ | $\Gamma_{15}^-$ | T <sub>1u</sub> | 3     | -1    | -1     | 0     | 1     | -3          | 1     | 1      | 0           | -1          |
| $\Gamma_5^+$ | $\Gamma_{25}^+$ | T <sub>2g</sub> | 3     | -1    | 1      | 0     | -1    | 3           | -1    | 1      | 0           | -1          |
| $\Gamma_5^-$ | $\Gamma_{25}^-$ | T <sub>2u</sub> | 3     | -1    | 1      | 0     | -1    | -3          | 1     | -1     | 0           | 1           |

<sup>a</sup>  $1 : \{1|\mathbf{R}_n\}$ , where  $\mathbf{R}_n = n_1\mathbf{a}_1 + n_2\mathbf{a}_2 + n_3\mathbf{a}_3$ ,  $\mathbf{a}_1 = a(1, 0, 0)$ ,  $\mathbf{a}_2 = a(0, 1, 0)$ , and  $\mathbf{a}_3 = a(0, 0, 1)$ , and  $n_1, n_2$ , and  $n_3$  are integer.

<sup>b</sup>  $2 : \{2_{001}|0\}, \{2_{010}|0\}, \{2_{100}|0\}$ .

<sup>c</sup>  $2' : \{2_{110}|0\}, \{2_{1\bar{1}0}|0\}, \{2_{101}|0\}, \{2_{\bar{1}01}|0\}, \{2_{011}|0\}, \{2_{01\bar{1}}|0\}$ .

<sup>d</sup>  $3 : \{3_{111}^+|0\}, \{3_{\bar{1}\bar{1}\bar{1}}^+|0\}, \{3_{1\bar{1}\bar{1}}^+|0\}, \{3_{\bar{1}\bar{1}1}^+|0\}, \{3_{111}^-|0\}, \{3_{\bar{1}\bar{1}1}^-|0\}, \{3_{1\bar{1}\bar{1}}^-|0\}, \{3_{\bar{1}\bar{1}\bar{1}}^-|0\}$ .

<sup>e</sup>  $4 : \{4_{001}^+|0\}, \{4_{010}^+|0\}, \{4_{100}^+|0\}, \{4_{001}^-|0\}, \{4_{010}^-|0\}, \{4_{100}^-|0\}$ .

<sup>f</sup>  $\bar{1} : \{\bar{1}|0\}$ .

<sup>g</sup>  $m : \{m_{001}|0\}, \{m_{010}|0\}, \{m_{100}|0\}$ .

<sup>h</sup>  $m' : \{m_{110}|0\}, \{m_{1\bar{1}0}|0\}, \{m_{101}|0\}, \{m_{\bar{1}01}|0\}, \{m_{011}|0\}, \{m_{01\bar{1}}|0\}$ .

<sup>i</sup>  $\bar{3} : \{\bar{3}_{111}^+|0\}, \{\bar{3}_{\bar{1}\bar{1}\bar{1}}^+|0\}, \{\bar{3}_{1\bar{1}\bar{1}}^+|0\}, \{\bar{3}_{\bar{1}\bar{1}1}^+|0\}, \{\bar{3}_{111}^-|0\}, \{\bar{3}_{\bar{1}\bar{1}1}^-|0\}, \{\bar{3}_{1\bar{1}\bar{1}}^-|0\}, \{\bar{3}_{\bar{1}\bar{1}\bar{1}}^-|0\}$ .

<sup>j</sup>  $\bar{4} : \{\bar{4}_{001}^+|0\}, \{\bar{4}_{010}^+|0\}, \{\bar{4}_{100}^+|0\}, \{\bar{4}_{001}^-|0\}, \{\bar{4}_{010}^-|0\}, \{\bar{4}_{100}^-|0\}$ .

Table S3: Character table for the group of the wavevector at an X point [ $\mathbf{k}_X = \frac{2\pi}{a}(0, \frac{1}{2}, 0)$ ] of the space group #221, which transforms isomorphically to  $4/mmm$  ( $D_{4h}$ )

| Bilbao  | BSW     | PG              | $1^a$                        | $2_y^b$ | $2_h^c$ | $2_{h'}^d$ | $4_y^e$ | $\bar{1}^f$ | $m_y^g$ | $m_v^h$ | $m_d^i$ | $\bar{4}_y^j$ |
|---------|---------|-----------------|------------------------------|---------|---------|------------|---------|-------------|---------|---------|---------|---------------|
| $X_1^+$ | $X_1^+$ | A <sub>1g</sub> | $1 \cdot T_{\mathbf{R}_n}^k$ | 1       | 1       | 1          | 1       | 1           | 1       | 1       | 1       | 1             |
| $X_1^-$ | $X_1^-$ | A <sub>1u</sub> | $1 \cdot T_{\mathbf{R}_n}$   | 1       | 1       | 1          | 1       | -1          | -1      | -1      | -1      | -1            |
| $X_2^+$ | $X_2^+$ | B <sub>1g</sub> | $1 \cdot T_{\mathbf{R}_n}$   | 1       | 1       | -1         | -1      | 1           | 1       | 1       | -1      | -1            |
| $X_2^-$ | $X_2^-$ | B <sub>1u</sub> | $1 \cdot T_{\mathbf{R}_n}$   | 1       | 1       | -1         | -1      | -1          | -1      | -1      | 1       | 1             |
| $X_3^+$ | $X_4^+$ | A <sub>2g</sub> | $1 \cdot T_{\mathbf{R}_n}$   | 1       | -1      | -1         | 1       | 1           | 1       | -1      | -1      | 1             |
| $X_3^-$ | $X_4^-$ | A <sub>2u</sub> | $1 \cdot T_{\mathbf{R}_n}$   | 1       | -1      | -1         | 1       | -1          | -1      | 1       | 1       | -1            |
| $X_4^+$ | $X_3^+$ | B <sub>2g</sub> | $1 \cdot T_{\mathbf{R}_n}$   | 1       | -1      | 1          | -1      | 1           | 1       | -1      | 1       | -1            |
| $X_4^-$ | $X_3^-$ | B <sub>2u</sub> | $1 \cdot T_{\mathbf{R}_n}$   | 1       | -1      | 1          | -1      | -1          | -1      | 1       | -1      | 1             |
| $X_5^+$ | $X_5^+$ | E <sub>g</sub>  | $2 \cdot T_{\mathbf{R}_n}$   | -2      | 0       | 0          | 0       | 2           | -2      | 0       | 0       | 0             |
| $X_5^-$ | $X_5^-$ | E <sub>u</sub>  | $2 \cdot T_{\mathbf{R}_n}$   | -2      | 0       | 0          | 0       | -2          | 2       | 0       | 0       | 0             |

<sup>a</sup>  $1 : \{1|\mathbf{R}_n\}$ , where  $\mathbf{R}_n = n_1\mathbf{a}_1 + n_2\mathbf{a}_2 + n_3\mathbf{a}_3$ ,  $\mathbf{a}_1 = a(1, 0, 0)$ ,  $\mathbf{a}_2 = a(0, 1, 0)$ , and  $\mathbf{a}_3 = a(0, 0, 1)$ , and  $n_1, n_2$ , and  $n_3$  are integer.

<sup>b</sup>  $2_y : \{2_{010}|0\}$ .

<sup>c</sup>  $2_h : \{2_{001}|0\}, \{2_{100}|0\}$ .

<sup>d</sup>  $2_{h'} : \{2_{101}|0\}, \{2_{\bar{1}01}|0\}$ .

<sup>e</sup>  $4_y : \{4_{010}^+|0\}, \{4_{010}^-|0\}$ .

<sup>f</sup>  $\bar{1} : \{\bar{1}|0\}$ .

<sup>g</sup>  $m_y : \{m_{010}|0\}$ .

<sup>h</sup>  $m_v : \{m_{001}|0\}, \{m_{100}|0\}$ .

<sup>i</sup>  $m_d : \{m_{101}|0\}, \{m_{\bar{1}01}|0\}$ .

<sup>j</sup>  $\bar{4}_y : \{\bar{4}_{010}^+|0\}, \{\bar{4}_{010}^-|0\}$ .

<sup>k</sup>  $T_{\mathbf{R}_n} = e^{i\pi n_2}$

Table S4: Character table for the group of the wavevector at an M point [ $\mathbf{k}_M = \frac{2\pi}{a}(\frac{1}{2}, \frac{1}{2}, 0)$ ] of the space group #221, which transforms isomorphically to  $4/mmm$  ( $D_{4h}$ )

| Bilbao  | BSW     | PG       | $1^a$                        | $2_z^b$ | $2_h^c$ | $2_{h'}^d$ | $4_z^e$ | $\bar{1}^f$ | $m_z^g$ | $m_v^h$ | $m_d^i$ | $\bar{4}_z^j$ |
|---------|---------|----------|------------------------------|---------|---------|------------|---------|-------------|---------|---------|---------|---------------|
| $M_1^+$ | $M_1^+$ | $A_{1g}$ | $1 \cdot T_{\mathbf{R}_n}^k$ | 1       | 1       | 1          | 1       | 1           | 1       | 1       | 1       | 1             |
| $M_1^-$ | $M_1^-$ | $A_{1u}$ | $1 \cdot T_{\mathbf{R}_n}$   | 1       | 1       | 1          | 1       | -1          | -1      | -1      | -1      | -1            |
| $M_2^+$ | $M_2^+$ | $B_{1g}$ | $1 \cdot T_{\mathbf{R}_n}$   | 1       | 1       | -1         | -1      | 1           | 1       | 1       | -1      | -1            |
| $M_2^-$ | $M_2^-$ | $B_{1u}$ | $1 \cdot T_{\mathbf{R}_n}$   | 1       | 1       | -1         | -1      | -1          | -1      | -1      | 1       | 1             |
| $M_3^+$ | $M_4^+$ | $A_{2g}$ | $1 \cdot T_{\mathbf{R}_n}$   | 1       | -1      | -1         | 1       | 1           | 1       | -1      | -1      | 1             |
| $M_3^-$ | $M_4^-$ | $A_{2u}$ | $1 \cdot T_{\mathbf{R}_n}$   | 1       | -1      | -1         | 1       | -1          | -1      | 1       | 1       | -1            |
| $M_4^+$ | $M_3^+$ | $B_{2g}$ | $1 \cdot T_{\mathbf{R}_n}$   | 1       | -1      | 1          | -1      | 1           | 1       | -1      | 1       | -1            |
| $M_4^-$ | $M_3^-$ | $B_{2u}$ | $1 \cdot T_{\mathbf{R}_n}$   | 1       | -1      | 1          | -1      | -1          | -1      | 1       | -1      | 1             |
| $M_5^+$ | $M_5^+$ | $E_g$    | $2 \cdot T_{\mathbf{R}_n}$   | -2      | 0       | 0          | 0       | 2           | -2      | 0       | 0       | 0             |
| $M_5^-$ | $M_5^-$ | $E_u$    | $2 \cdot T_{\mathbf{R}_n}$   | -2      | 0       | 0          | 0       | -2          | 2       | 0       | 0       | 0             |

<sup>a</sup>  $1 : \{1|\mathbf{R}_n\}$ , where  $\mathbf{R}_n = n_1\mathbf{a}_1 + n_2\mathbf{a}_2 + n_3\mathbf{a}_3$ ,  $\mathbf{a}_1 = a(1, 0, 0)$ ,  $\mathbf{a}_2 = a(0, 1, 0)$ , and  $\mathbf{a}_3 = a(0, 0, 1)$ , and  $n_1, n_2$ , and  $n_3$  are integer.

<sup>b</sup>  $2_z : \{2_{001}|0\}$ .

<sup>c</sup>  $2_h : \{2_{010}|0\}, \{2_{100}|0\}$ .

<sup>d</sup>  $2_{h'} : \{2_{110}|0\}, \{2_{\bar{1}\bar{1}0}|0\}$ .

<sup>e</sup>  $4_z : \{4_{001}^+|0\}, \{4_{001}^-|0\}$ .

<sup>f</sup>  $\bar{1} : \{\bar{1}|0\}$ .

<sup>g</sup>  $m_z : \{m_{001}|0\}$ .

<sup>h</sup>  $m_v : \{m_{010}|0\}, \{m_{100}|0\}$ .

<sup>i</sup>  $m_d : \{m_{110}|0\}, \{m_{1\bar{1}0}|0\}$ .

<sup>j</sup>  $\bar{4}_z : \{\bar{4}_{001}^+|0\}, \{\bar{4}_{001}^-|0\}$ .

<sup>k</sup>  $T_{\mathbf{R}_n} = e^{i\pi(n_1+n_2)}$

Table S5: Character table for the group of the wavevector at an R point [ $\mathbf{k}_R = \frac{2\pi}{a}(\frac{1}{2}, \frac{1}{2}, \frac{1}{2})$ ] of the space group #221, which transforms isomorphically to the point group  $m\bar{3}m (O_h)$

| Bilbao  | BSW        | PG       | $1^a$                        | $2^b$ | $2'^c$ | $3^d$ | $4^e$ | $\bar{1}^f$ | $m^g$ | $m'^h$ | $\bar{3}^i$ | $\bar{4}^j$ |
|---------|------------|----------|------------------------------|-------|--------|-------|-------|-------------|-------|--------|-------------|-------------|
| $R_1^+$ | $R_1^+$    | $A_{1g}$ | $1 \cdot T_{\mathbf{R}_n}^k$ | 1     | 1      | 1     | 1     | 1           | 1     | 1      | 1           | 1           |
| $R_1^-$ | $R_1^-$    | $A_{1u}$ | $1 \cdot T_{\mathbf{R}_n}$   | 1     | 1      | 1     | 1     | -1          | -1    | -1     | -1          | -1          |
| $R_2^+$ | $R_2^+$    | $A_{2g}$ | $1 \cdot T_{\mathbf{R}_n}$   | 1     | -1     | 1     | -1    | 1           | 1     | -1     | 1           | -1          |
| $R_2^-$ | $R_2^-$    | $A_{2u}$ | $1 \cdot T_{\mathbf{R}_n}$   | 1     | -1     | 1     | -1    | -1          | -1    | 1      | -1          | 1           |
| $R_3^+$ | $R_{12}^+$ | $E_g$    | $2 \cdot T_{\mathbf{R}_n}$   | 2     | 0      | -1    | 0     | 2           | 2     | 0      | -1          | 0           |
| $R_3^-$ | $R_{12}^-$ | $E_u$    | $2 \cdot T_{\mathbf{R}_n}$   | 2     | 0      | -1    | 0     | -2          | -2    | 0      | 1           | 0           |
| $R_4^+$ | $R_{15}^+$ | $T_{1g}$ | $3 \cdot T_{\mathbf{R}_n}$   | -1    | -1     | 0     | 1     | 3           | -1    | -1     | 0           | 1           |
| $R_4^-$ | $R_{15}^-$ | $T_{1u}$ | $3 \cdot T_{\mathbf{R}_n}$   | -1    | -1     | 0     | 1     | -3          | 1     | 1      | 0           | -1          |
| $R_5^+$ | $R_{25}^+$ | $T_{2g}$ | $3 \cdot T_{\mathbf{R}_n}$   | -1    | 1      | 0     | -1    | 3           | -1    | 1      | 0           | -1          |
| $R_5^-$ | $R_{25}^-$ | $T_{2u}$ | $3 \cdot T_{\mathbf{R}_n}$   | -1    | 1      | 0     | -1    | -3          | 1     | -1     | 0           | 1           |

<sup>a</sup>  $1 : \{1|\mathbf{R}_n\}$ , where  $\mathbf{R}_n = n_1\mathbf{a}_1 + n_2\mathbf{a}_2 + n_3\mathbf{a}_3$ ,  $\mathbf{a}_1 = a(1, 0, 0)$ ,  $\mathbf{a}_2 = a(0, 1, 0)$ , and  $\mathbf{a}_3 = a(0, 0, 1)$ , and  $n_1, n_2$ , and  $n_3$  are integer.

<sup>b</sup>  $2 : \{2_{001}|0\}, \{2_{010}|0\}, \{2_{100}|0\}$ .

<sup>c</sup>  $2' : \{2_{110}|0\}, \{2_{1\bar{1}0}|0\}, \{2_{101}|0\}, \{2_{\bar{1}01}|0\}, \{2_{011}|0\}, \{2_{01\bar{1}}|0\}$ .

<sup>d</sup>  $3 : \{3_{111}^+|0\}, \{3_{\bar{1}\bar{1}\bar{1}}^+|0\}, \{3_{1\bar{1}\bar{1}}^+|0\}, \{3_{\bar{1}\bar{1}1}^+|0\}, \{3_{111}^-|0\}, \{3_{\bar{1}\bar{1}\bar{1}}^-|0\}, \{3_{1\bar{1}\bar{1}}^-|0\}, \{3_{\bar{1}\bar{1}1}^-|0\}$ .

<sup>e</sup>  $4 : \{4_{001}^+|0\}, \{4_{010}^+|0\}, \{4_{100}^+|0\}, \{4_{001}^-|0\}, \{4_{010}^-|0\}, \{4_{100}^-|0\}$ .

<sup>f</sup>  $\bar{1} : \{\bar{1}|0\}$ .

<sup>g</sup>  $m : \{m_{001}|0\}, \{m_{010}|0\}, \{m_{100}|0\}$ .

<sup>h</sup>  $m' : \{m_{110}|0\}, \{m_{1\bar{1}0}|0\}, \{m_{101}|0\}, \{m_{\bar{1}01}|0\}, \{m_{011}|0\}, \{m_{01\bar{1}}|0\}$ .

<sup>i</sup>  $\bar{3} : \{\bar{3}_{111}^+|0\}, \{\bar{3}_{\bar{1}\bar{1}\bar{1}}^+|0\}, \{\bar{3}_{1\bar{1}\bar{1}}^+|0\}, \{\bar{3}_{\bar{1}\bar{1}1}^+|0\}, \{\bar{3}_{111}^-|0\}, \{\bar{3}_{\bar{1}\bar{1}\bar{1}}^-|0\}, \{\bar{3}_{1\bar{1}\bar{1}}^-|0\}, \{\bar{3}_{\bar{1}\bar{1}1}^-|0\}$ .

<sup>j</sup>  $\bar{4} : \{\bar{4}_{001}^+|0\}, \{\bar{4}_{010}^+|0\}, \{\bar{4}_{100}^+|0\}, \{\bar{4}_{001}^-|0\}, \{\bar{4}_{010}^-|0\}, \{\bar{4}_{100}^-|0\}$ .

<sup>k</sup>  $T_{\mathbf{R}_n} = e^{i\pi(n_1+n_2+n_3)}$

Table S6: Character table for the group of the wavevector along a  $\Delta$  axis [ $\mathbf{k}_\Delta = \frac{2\pi}{a}(0, \frac{1}{2}u, 0)$ , where  $0 < u < 1$ ] of the space group #221, which transforms isomorphically to  $4mm (C_{4v})$

| Bilbao     | BSW           | PG    | $1^a$                        | $2^b$ | $4^c$ | $m_v^d$ | $m_d^e$ |
|------------|---------------|-------|------------------------------|-------|-------|---------|---------|
| $\Delta_1$ | $\Delta_1$    | $A_1$ | $1 \cdot T_{\mathbf{R}_n}^f$ | 1     | 1     | 1       | 1       |
| $\Delta_2$ | $\Delta_2$    | $B_1$ | $1 \cdot T_{\mathbf{R}_n}$   | 1     | -1    | 1       | -1      |
| $\Delta_3$ | $\Delta_{2'}$ | $B_2$ | $1 \cdot T_{\mathbf{R}_n}$   | 1     | -1    | -1      | 1       |
| $\Delta_4$ | $\Delta_{1'}$ | $A_2$ | $1 \cdot T_{\mathbf{R}_n}$   | 1     | 1     | -1      | -1      |
| $\Delta_5$ | $\Delta_5$    | $E$   | $2 \cdot T_{\mathbf{R}_n}$   | -2    | 0     | 0       | 0       |

<sup>a</sup>  $1 : \{1|\mathbf{R}_n\}$ , where  $\mathbf{R}_n = n_1\mathbf{a}_1 + n_2\mathbf{a}_2 + n_3\mathbf{a}_3$ ,  $\mathbf{a}_1 = a(1, 0, 0)$ ,  $\mathbf{a}_2 = a(0, 1, 0)$ , and  $\mathbf{a}_3 = a(0, 0, 1)$ , and  $n_1, n_2$ , and  $n_3$  are integer.

<sup>b</sup>  $2 : \{2_{010}|0\}$ .

<sup>c</sup>  $4 : \{4_{010}^+|0\}, \{4_{010}^-|0\}$ .

<sup>d</sup>  $m_v : \{m_{001}|0\}, \{m_{100}|0\}$ .

<sup>e</sup>  $m_d : \{m_{101}|0\}, \{m_{\bar{1}01}|0\}$ .

<sup>f</sup>  $T_{\mathbf{R}_n} = e^{i\pi n_2 u}$

Table S7: Character table for the group of the wavevector along a  $\Sigma$  axis [ $\mathbf{k}_\Sigma = \frac{2\pi}{a}(\frac{1}{2}u, \frac{1}{2}u, 0)$ , where  $0 < u < 1$ ] of the space group #221, which transforms isomorphically to  $mm2$  ( $C_{2v}$ )

| Bilbao     | BSW        | PG    | $1^a$                        | $2'^b$ | $m_z^c$ | $m'^d$ |
|------------|------------|-------|------------------------------|--------|---------|--------|
| $\Sigma_1$ | $\Sigma_1$ | $A_1$ | $1 \cdot T_{\mathbf{R}_n}^e$ | 1      | 1       | 1      |
| $\Sigma_2$ | $\Sigma_4$ | $B_2$ | $1 \cdot T_{\mathbf{R}_n}$   | -1     | 1       | -1     |
| $\Sigma_3$ | $\Sigma_3$ | $B_1$ | $1 \cdot T_{\mathbf{R}_n}$   | -1     | -1      | 1      |
| $\Sigma_4$ | $\Sigma_2$ | $A_2$ | $1 \cdot T_{\mathbf{R}_n}$   | 1      | -1      | -1     |

<sup>a</sup>  $1 : \{1|\mathbf{R}_n\}$ , where  $\mathbf{R}_n = n_1\mathbf{a}_1 + n_2\mathbf{a}_2 + n_3\mathbf{a}_3$ ,  $\mathbf{a}_1 = a(1, 0, 0)$ ,  $\mathbf{a}_2 = a(0, 1, 0)$ , and  $\mathbf{a}_3 = a(0, 0, 1)$ , and  $n_1, n_2$ , and  $n_3$  are integer.

<sup>b</sup>  $2' : \{2_{110}|0\}$ .

<sup>c</sup>  $m_z : \{m_{001}|0\}$ .

<sup>d</sup>  $m' : \{m_{1\bar{1}0}|0\}$ .

<sup>e</sup>  $T_{\mathbf{R}_n} = e^{i\pi(n_1u+n_2u)}$

Table S8: Character table for the group of the wavevector along a  $\Lambda$  axis [ $\mathbf{k}_\Lambda = \frac{2\pi}{a}(\frac{1}{2}u, \frac{1}{2}u, \frac{1}{2}u)$ , where  $0 < u < 1$ ] of the space group #221, which transforms isomorphically to  $3m$  ( $C_{3v}$ )

| Bilbao      | BSW         | PG    | $1^a$                        | $3^b$ | $m_d^c$ |
|-------------|-------------|-------|------------------------------|-------|---------|
| $\Lambda_1$ | $\Lambda_1$ | $A_1$ | $1 \cdot T_{\mathbf{R}_n}^d$ | 1     | 1       |
| $\Lambda_2$ | $\Lambda_2$ | $A_2$ | $1 \cdot T_{\mathbf{R}_n}$   | 1     | -1      |
| $\Lambda_3$ | $\Lambda_3$ | $E$   | $2 \cdot T_{\mathbf{R}_n}$   | -1    | 0       |

<sup>a</sup>  $1 : \{1|\mathbf{R}_n\}$ , where  $\mathbf{R}_n = n_1\mathbf{a}_1 + n_2\mathbf{a}_2 + n_3\mathbf{a}_3$ ,  $\mathbf{a}_1 = a(1, 0, 0)$ ,  $\mathbf{a}_2 = a(0, 1, 0)$ , and  $\mathbf{a}_3 = a(0, 0, 1)$ , and  $n_1, n_2$ , and  $n_3$  are integer.

<sup>b</sup>  $3 : \{3_{111}^+|0\}, \{3_{111}^-|0\}$ .

<sup>c</sup>  $m_d : \{m_{1\bar{1}0}|0\}, \{m_{\bar{1}01}|0\}, \{m_{01\bar{1}}|0\}$ .

<sup>d</sup>  $T_{\mathbf{R}_n} = e^{i\pi(n_1u+n_2u+n_3u)}$

Table S9: Character table for the group of the wavevector along a  $Z$  axis [ $\mathbf{k}_Z = \frac{2\pi}{a}(\frac{1}{2}u, \frac{1}{2}u, 0)$ , where  $0 < u < 1$ ] of the space group #221, which transforms isomorphically to  $mm2$  ( $C_{2v}$ )

| Bilbao | BSW   | PG    | $1^a$                        | $2_x^b$ | $m_z^c$ | $m_y^d$ |
|--------|-------|-------|------------------------------|---------|---------|---------|
| $Z_1$  | $Z_1$ | $A_1$ | $1 \cdot T_{\mathbf{R}_n}^e$ | 1       | 1       | 1       |
| $Z_2$  | $Z_2$ | $A_2$ | $1 \cdot T_{\mathbf{R}_n}$   | 1       | -1      | -1      |
| $Z_3$  | $Z_4$ | $B_2$ | $1 \cdot T_{\mathbf{R}_n}$   | -1      | -1      | 1       |
| $Z_4$  | $Z_3$ | $B_1$ | $1 \cdot T_{\mathbf{R}_n}$   | -1      | 1       | -1      |

<sup>a</sup>  $1 : \{1|\mathbf{R}_n\}$ , where  $\mathbf{R}_n = n_1\mathbf{a}_1 + n_2\mathbf{a}_2 + n_3\mathbf{a}_3$ ,  $\mathbf{a}_1 = a(1, 0, 0)$ ,  $\mathbf{a}_2 = a(0, 1, 0)$ , and  $\mathbf{a}_3 = a(0, 0, 1)$ , and  $n_1, n_2$ , and  $n_3$  are integer.

<sup>b</sup>  $2_x : \{2_{100}|0\}$ .

<sup>c</sup>  $m_z : \{m_{001}|0\}$ .

<sup>d</sup>  $m_y : \{m_{010}|0\}$ .

<sup>e</sup>  $T_{\mathbf{R}_n} = e^{i\pi(n_1u+n_2)}$

Table S10: Representations of s, p, and d orbitals for the group of the wavevector at the  $\Gamma$  point of the space group #221

| $m\bar{3}m$              | 1 | 2  | 2' | 3  | 4  | $\bar{1}$ | $m$ | $m'$ | $\bar{3}$ | $\bar{4}$ | Irreducible representations    |
|--------------------------|---|----|----|----|----|-----------|-----|------|-----------|-----------|--------------------------------|
| $\Gamma_s^{\text{atom}}$ | 1 | 1  | 1  | 1  | 1  | 1         | 1   | 1    | 1         | 1         | $\Gamma_1^+$                   |
| $\Gamma_p^{\text{atom}}$ | 3 | -1 | -1 | 0  | 1  | -3        | 1   | 1    | 0         | -1        | $\Gamma_4^-$                   |
| $\Gamma_d^{\text{atom}}$ | 5 | 1  | 1  | -1 | -1 | 5         | 1   | 1    | -1        | -1        | $\Gamma_3^+ \oplus \Gamma_5^+$ |

Table S11: Representations of s, p, and d orbitals for the group of the wavevector at an X point of the space group #221

| $4/mmm$             | 1 | $2_y$ | $2_h$ | $2_{h'}$ | $4_y$ | $\bar{1}$ | $m_y$ | $m_v$ | $m_d$ | $\bar{4}_y$ | Irreducible representations                    |
|---------------------|---|-------|-------|----------|-------|-----------|-------|-------|-------|-------------|------------------------------------------------|
| $X_s^{\text{atom}}$ | 1 | 1     | 1     | 1        | 1     | 1         | 1     | 1     | 1     | 1           | $X_1^+$                                        |
| $X_p^{\text{atom}}$ | 3 | -1    | -1    | -1       | 1     | -3        | 1     | 1     | 1     | -1          | $X_3^- \oplus X_5^-$                           |
| $X_d^{\text{atom}}$ | 5 | 1     | 1     | 1        | -1    | 5         | 1     | 1     | 1     | -1          | $X_1^+ \oplus X_2^+ \oplus X_4^+ \oplus X_5^+$ |

Table S12: Representations of s, p, and d orbitals for the group of the wavevector at an M point of the space group #221

| $4/mmm$             | 1 | $2_z$ | $2_h$ | $2_{h'}$ | $4_z$ | $\bar{1}$ | $m_z$ | $m_v$ | $m_d$ | $\bar{4}_z$ | Irreducible representations                    |
|---------------------|---|-------|-------|----------|-------|-----------|-------|-------|-------|-------------|------------------------------------------------|
| $M_s^{\text{atom}}$ | 1 | 1     | 1     | 1        | 1     | 1         | 1     | 1     | 1     | 1           | $M_1^+$                                        |
| $M_p^{\text{atom}}$ | 3 | -1    | -1    | -1       | 1     | -3        | 1     | 1     | 1     | -1          | $M_3^- \oplus M_5^-$                           |
| $M_d^{\text{atom}}$ | 5 | 1     | 1     | 1        | -1    | 5         | 1     | 1     | 1     | -1          | $M_1^+ \oplus M_2^+ \oplus M_4^+ \oplus M_5^+$ |

Table S13: Representations of s, p, and d orbitals for the group of the wavevector at an R point of the space group #221

| $m\bar{3}m$         | 1 | 2  | 2' | 3  | 4  | $\bar{1}$ | $m$ | $m'$ | $\bar{3}$ | $\bar{4}$ | Irreducible representations |
|---------------------|---|----|----|----|----|-----------|-----|------|-----------|-----------|-----------------------------|
| $R_s^{\text{atom}}$ | 1 | 1  | 1  | 1  | 1  | 1         | 1   | 1    | 1         | 1         | $R_1^+$                     |
| $R_p^{\text{atom}}$ | 3 | -1 | -1 | 0  | 1  | -3        | 1   | 1    | 0         | -1        | $R_4^-$                     |
| $R_d^{\text{atom}}$ | 5 | 1  | 1  | -1 | -1 | 5         | 1   | 1    | -1        | -1        | $R_3^+ \oplus R_5^+$        |

Table S14: Equivalence representations of Ti, Sr, and  $O_3$  atoms in  $\text{SrTiO}_3$  for the group of the wavevector at the  $\Gamma$  point of the space group #221

| $m\bar{3}m$                         | 1 | 2 | 2' | 3 | 4 | $\bar{1}$ | $m$ | $m'$ | $\bar{3}$ | $\bar{4}$ | Irreducible representations    |
|-------------------------------------|---|---|----|---|---|-----------|-----|------|-----------|-----------|--------------------------------|
| $\Gamma_{\text{Ti}}^{\text{equiv}}$ | 1 | 1 | 1  | 1 | 1 | 1         | 1   | 1    | 1         | 1         | $\Gamma_1^+$                   |
| $\Gamma_{\text{Sr}}^{\text{equiv}}$ | 1 | 1 | 1  | 1 | 1 | 1         | 1   | 1    | 1         | 1         | $\Gamma_1^+$                   |
| $\Gamma_{O_3}^{\text{equiv}}$       | 3 | 3 | 1  | 0 | 1 | 3         | 3   | 1    | 0         | 1         | $\Gamma_1^+ \oplus \Gamma_3^+$ |

Table S15: Equivalence representations of Ti, Sr, and  $O_3$  atoms in  $\text{SrTiO}_3$  for the group of the wavevector at an X point of the space group #221

| $4/mmm$                        | 1 | $2_y$ | $2_h$ | $2_{h'}$ | $4_y$ | $\bar{1}$ | $m_y$ | $m_v$ | $m_d$ | $\bar{4}_y$ | Irreducible representations       |
|--------------------------------|---|-------|-------|----------|-------|-----------|-------|-------|-------|-------------|-----------------------------------|
| $X_{\text{Ti}}^{\text{equiv}}$ | 1 | 1     | 1     | 1        | 1     | 1         | 1     | 1     | 1     | 1           | $X_1^+$                           |
| $X_{\text{Sr}}^{\text{equiv}}$ | 1 | 1     | -1    | -1       | 1     | -1        | -1    | 1     | 1     | -1          | $X_3^-$                           |
| $X_{O_3}^{\text{equiv}}$       | 3 | 3     | 1     | -1       | 1     | 1         | 1     | 3     | 1     | -1          | $X_1^+ \oplus X_2^+ \oplus X_3^-$ |

Table S16: Equivalence representations of Ti, Sr, and O<sub>3</sub> atoms in SrTiO<sub>3</sub> for the group of the wavevector at an M point of the space group #221

| $4/mmm$                         | 1 | $2_z$ | $2_h$ | $2_{h'}$ | $4_z$ | $\bar{1}$ | $m_z$ | $m_v$ | $m_d$ | $\bar{4}_z$ | Irreducible representations |
|---------------------------------|---|-------|-------|----------|-------|-----------|-------|-------|-------|-------------|-----------------------------|
| $M_{\text{Ti}}^{\text{equiv}}$  | 1 | 1     | 1     | 1        | 1     | 1         | 1     | 1     | 1     | 1           | $M_1^+$                     |
| $M_{\text{Sr}}^{\text{equiv}}$  | 1 | 1     | -1    | 1        | -1    | 1         | 1     | -1    | 1     | -1          | $M_4^+$                     |
| $M_{\text{O}_3}^{\text{equiv}}$ | 3 | -1    | 1     | 1        | 1     | -1        | 3     | 1     | 1     | 1           | $M_1^+ \oplus M_5^-$        |

Table S17: Equivalence representations of Ti, Sr, and O<sub>3</sub> atoms in SrTiO<sub>3</sub> for the group of the wavevector at an R point of the space group #221

| $m\bar{3}m$                     | 1 | 2  | $2'$ | 3 | 4  | $\bar{1}$ | $m$ | $m'$ | $\bar{3}$ | $\bar{4}$ | Irreducible representations |
|---------------------------------|---|----|------|---|----|-----------|-----|------|-----------|-----------|-----------------------------|
| $R_{\text{Ti}}^{\text{equiv}}$  | 1 | 1  | 1    | 1 | 1  | 1         | 1   | 1    | 1         | 1         | $R_1^+$                     |
| $R_{\text{Sr}}^{\text{equiv}}$  | 1 | 1  | -1   | 1 | -1 | -1        | -1  | 1    | -1        | 1         | $R_2^-$                     |
| $R_{\text{O}_3}^{\text{equiv}}$ | 3 | -1 | -1   | 0 | 1  | -3        | 1   | 1    | 0         | -1        | $R_4^-$                     |

Table S18: Equivalence representations of sets of plane waves  $e^{i(\mathbf{k}_\Gamma + \mathbf{G}) \cdot \mathbf{r}}$  for the group of the wavevector at the  $\Gamma$  point  $[\mathbf{k}_\Gamma = \frac{2\pi}{a}(0,0,0)]$  of the space group #221, which transforms isomorphically to  $m\bar{3}m$  ( $O_h$ ). Plane waves are sorted by  $|\mathbf{k}_\Gamma + \mathbf{G}|$  and labeled by  $\frac{a}{2\pi}\{\mathbf{k}_\Gamma + \mathbf{G}\}$

| $\frac{a}{2\pi}\{\mathbf{k}_\Gamma + \mathbf{G}\}$ | 1  | 2 | $2'$ | 3 | 4 | $\bar{1}$ | $m$ | $m'$ | $\bar{3}$ | $\bar{4}$ | Irreducible representations                                                                                                                                                          |
|----------------------------------------------------|----|---|------|---|---|-----------|-----|------|-----------|-----------|--------------------------------------------------------------------------------------------------------------------------------------------------------------------------------------|
| $\{0,0,0\}$                                        | 1  | 1 | 1    | 1 | 1 | 1         | 1   | 1    | 1         | 1         | $\Gamma_1^+$                                                                                                                                                                         |
| $\{1,0,0\}$                                        | 6  | 2 | 0    | 0 | 2 | 0         | 4   | 2    | 0         | 0         | $\Gamma_1^+ \oplus \Gamma_3^+ \oplus \Gamma_4^-$                                                                                                                                     |
| $\{1,1,0\}$                                        | 12 | 0 | 2    | 0 | 0 | 0         | 4   | 2    | 0         | 0         | $\Gamma_1^+ \oplus \Gamma_3^+ \oplus \Gamma_4^- \oplus \Gamma_5^+ \oplus \Gamma_5^-$                                                                                                 |
| $\{1,1,1\}$                                        | 8  | 0 | 0    | 2 | 0 | 0         | 0   | 4    | 0         | 0         | $\Gamma_1^+ \oplus \Gamma_2^- \oplus \Gamma_4^- \oplus \Gamma_5^+$                                                                                                                   |
| $\{2,0,0\}$                                        | 6  | 2 | 0    | 0 | 2 | 0         | 4   | 2    | 0         | 0         | $\Gamma_1^+ \oplus \Gamma_3^+ \oplus \Gamma_4^-$                                                                                                                                     |
| $\{2,1,0\}$                                        | 24 | 0 | 0    | 0 | 0 | 0         | 8   | 0    | 0         | 0         | $\Gamma_1^+ \oplus \Gamma_2^+ \oplus 2\Gamma_3^+ \oplus \Gamma_4^+ \oplus 2\Gamma_4^- \oplus \Gamma_5^+ \oplus 2\Gamma_5^-$                                                          |
| $\{2,1,1\}$                                        | 24 | 0 | 0    | 0 | 0 | 0         | 0   | 4    | 0         | 0         | $\Gamma_1^+ \oplus \Gamma_2^- \oplus \Gamma_3^+ \oplus \Gamma_3^- \oplus \Gamma_4^+ \oplus 2\Gamma_4^- \oplus 2\Gamma_5^+ \oplus \Gamma_5^-$                                         |
| $\{2,2,0\}$                                        | 12 | 0 | 2    | 0 | 0 | 0         | 4   | 2    | 0         | 0         | $\Gamma_1^+ \oplus \Gamma_3^+ \oplus \Gamma_4^- \oplus \Gamma_5^+ \oplus \Gamma_5^-$                                                                                                 |
| $\{2,2,1\}$                                        | 24 | 0 | 0    | 0 | 0 | 0         | 0   | 4    | 0         | 0         | $\Gamma_1^+ \oplus \Gamma_2^- \oplus \Gamma_3^+ \oplus \Gamma_3^- \oplus \Gamma_4^+ \oplus 2\Gamma_4^- \oplus 2\Gamma_5^+ \oplus \Gamma_5^-$                                         |
| $\{3,0,0\}$                                        | 6  | 2 | 0    | 0 | 2 | 0         | 4   | 2    | 0         | 0         | $\Gamma_1^+ \oplus \Gamma_3^+ \oplus \Gamma_4^-$                                                                                                                                     |
| $\{3,1,0\}$                                        | 24 | 0 | 0    | 0 | 0 | 0         | 8   | 0    | 0         | 0         | $\Gamma_1^+ \oplus \Gamma_2^+ \oplus 2\Gamma_3^+ \oplus \Gamma_4^+ \oplus 2\Gamma_4^- \oplus \Gamma_5^+ \oplus 2\Gamma_5^-$                                                          |
| $\{3,1,1\}$                                        | 24 | 0 | 0    | 0 | 0 | 0         | 0   | 4    | 0         | 0         | $\Gamma_1^+ \oplus \Gamma_2^- \oplus \Gamma_3^+ \oplus \Gamma_3^- \oplus \Gamma_4^+ \oplus 2\Gamma_4^- \oplus 2\Gamma_5^+ \oplus \Gamma_5^-$                                         |
| $\{2,2,2\}$                                        | 8  | 0 | 0    | 2 | 0 | 0         | 0   | 4    | 0         | 0         | $\Gamma_1^+ \oplus \Gamma_2^- \oplus \Gamma_4^- \oplus \Gamma_5^+$                                                                                                                   |
| $\{3,2,1\}$                                        | 48 | 0 | 0    | 0 | 0 | 0         | 0   | 0    | 0         | 0         | $\Gamma_1^+ \oplus \Gamma_1^- \oplus \Gamma_2^+ \oplus \Gamma_2^- \oplus 2\Gamma_3^+ \oplus 2\Gamma_3^- \oplus 3\Gamma_4^+ \oplus 3\Gamma_4^- \oplus 3\Gamma_5^+ \oplus 3\Gamma_5^-$ |

Table S19: Equivalence representations of sets of plane waves  $e^{i(\mathbf{k}_X + \mathbf{G}) \cdot \mathbf{r}}$  for the group of the wavevector at an X point  $[\mathbf{k}_X = \frac{2\pi}{a}(0, \frac{1}{2}, 0)]$  of the space group #221, which transforms isomorphically to  $4/mmm$  ( $D_{4h}$ ). Plane waves are sorted by  $|\mathbf{k}_X + \mathbf{G}|$  and labeled by  $\frac{a}{2\pi}\{\mathbf{k}_X + \mathbf{G}\}$

| $\frac{a}{2\pi}\{\mathbf{k}_X + \mathbf{G}\}$ | 1  | $2_y$ | $2_h$ | $2_{h'}$ | $4_y$ | $\bar{1}$ | $m_y$ | $m_v$ | $m_d$ | $\bar{4}_y$ | Irreducible representations                                                                                                         |
|-----------------------------------------------|----|-------|-------|----------|-------|-----------|-------|-------|-------|-------------|-------------------------------------------------------------------------------------------------------------------------------------|
| $\{0, \frac{1}{2}, 0\}^a$                     | 2  | 2     | 0     | 0        | 2     | 0         | 0     | 2     | 2     | 0           | $X_1^+ \oplus X_3^-$                                                                                                                |
| $\{1, \frac{1}{2}, 0\}^b$                     | 8  | 0     | 0     | 0        | 0     | 0         | 0     | 4     | 0     | 0           | $X_1^+ \oplus X_2^+ \oplus X_3^- \oplus X_4^- \oplus X_5^+ \oplus X_5^-$                                                            |
| $\{0, \frac{3}{2}, 0\}^c$                     | 2  | 2     | 0     | 0        | 2     | 0         | 0     | 2     | 2     | 0           | $X_1^+ \oplus X_3^-$                                                                                                                |
| $\{1, \frac{1}{2}, 1\}^d$                     | 8  | 0     | 0     | 0        | 0     | 0         | 0     | 0     | 4     | 0           | $X_1^+ \oplus X_2^- \oplus X_3^- \oplus X_4^+ \oplus X_5^+ \oplus X_5^-$                                                            |
| $\{1, \frac{3}{2}, 0\}^e$                     | 8  | 0     | 0     | 0        | 0     | 0         | 0     | 4     | 0     | 0           | $X_1^+ \oplus X_2^+ \oplus X_3^- \oplus X_4^- \oplus X_5^+ \oplus X_5^-$                                                            |
| $\{1, \frac{3}{2}, 1\}^f$                     | 8  | 0     | 0     | 0        | 0     | 0         | 0     | 0     | 4     | 0           | $X_1^+ \oplus X_2^- \oplus X_3^- \oplus X_4^+ \oplus X_5^+ \oplus X_5^-$                                                            |
| $\{2, \frac{1}{2}, 0\}^g$                     | 8  | 0     | 0     | 0        | 0     | 0         | 0     | 4     | 0     | 0           | $X_1^+ \oplus X_2^+ \oplus X_3^- \oplus X_4^- \oplus X_5^+ \oplus X_5^-$                                                            |
| $\{2, \frac{1}{2}, 1\}^h$                     | 16 | 0     | 0     | 0        | 0     | 0         | 0     | 0     | 0     | 0           | $X_1^+ \oplus X_1^- \oplus X_2^+ \oplus X_2^- \oplus X_3^+ \oplus X_3^-$<br>$\oplus X_4^+ \oplus X_4^- \oplus 2X_5^+ \oplus 2X_5^-$ |

- $^a \frac{a}{2\pi}\mathbf{G}$ 's are  $(0, 0, 0), (0, \bar{1}, 0)$ .
- $^b \frac{a}{2\pi}\mathbf{G}$ 's are  $(1, 0, 0), (1, \bar{1}, 0), (\bar{1}, 0, 0), (\bar{1}, \bar{1}, 0), (0, 0, 1), (0, \bar{1}, 1), (0, 0, \bar{1}), (0, \bar{1}, \bar{1})$ .
- $^c \frac{a}{2\pi}\mathbf{G}$ 's are  $(0, 1, 0), (0, \bar{2}, 0)$ .
- $^d \frac{a}{2\pi}\mathbf{G}$ 's are  $(1, 0, 1), (1, \bar{1}, 1), (1, 0, \bar{1}), (1, \bar{1}, \bar{1}), (\bar{1}, 0, 1), (\bar{1}, \bar{1}, 1), (\bar{1}, 0, \bar{1}), (\bar{1}, \bar{1}, \bar{1})$ .
- $^e \frac{a}{2\pi}\mathbf{G}$ 's are  $(1, 1, 0), (1, \bar{2}, 0), (\bar{1}, 1, 0), (\bar{1}, \bar{2}, 0), (0, 1, 1), (0, \bar{2}, 1), (0, 1, \bar{1}), (0, \bar{2}, \bar{1})$ .
- $^f \frac{a}{2\pi}\mathbf{G}$ 's are  $(1, 1, 1), (1, \bar{2}, 1), (1, 1, \bar{1}), (1, \bar{2}, \bar{1}), (\bar{1}, 1, 1), (\bar{1}, \bar{2}, 1), (\bar{1}, 1, \bar{1}), (\bar{1}, \bar{2}, \bar{1})$ .
- $^g \frac{a}{2\pi}\mathbf{G}$ 's are  $(2, 0, 0), (2, \bar{1}, 0), (\bar{2}, 0, 0), (\bar{2}, \bar{1}, 0), (0, 0, 2), (0, \bar{1}, 2), (0, 0, \bar{2}), (0, \bar{1}, \bar{2})$ .
- $^h \frac{a}{2\pi}\mathbf{G}$ 's are  $(2, 0, 1), (2, \bar{1}, 1), (2, 0, \bar{1}), (2, \bar{1}, \bar{1}), (2, 0, 1), (2, \bar{1}, 1), (\bar{2}, 0, \bar{1}), (\bar{2}, \bar{1}, \bar{1}), (1, 0, 2), (1, \bar{1}, 2), (\bar{1}, 0, 2), (\bar{1}, \bar{1}, 2), (1, 0, \bar{2}), (1, \bar{1}, \bar{2}), (\bar{1}, 0, \bar{2}), (\bar{1}, \bar{1}, \bar{2})$ .

Table S20: Equivalence representations of sets of plane waves  $e^{i(\mathbf{k}_M + \mathbf{G}) \cdot \mathbf{r}}$  for the group of the wavevector at an M point  $[\mathbf{k}_M = \frac{2\pi}{a}(\frac{1}{2}, \frac{1}{2}, 0)]$  of the space group #221, which transforms isomorphically to  $4/mmm$  ( $D_{4h}$ ). Plane waves are sorted by  $|\mathbf{k}_M + \mathbf{G}|$  and labeled by  $\frac{a}{2\pi}\{\mathbf{k}_M + \mathbf{G}\}$

| $\frac{a}{2\pi}\{\mathbf{k}_M + \mathbf{G}\}$ | 1  | $2_z$ | $2_h$ | $2_{h'}$ | $4_z$ | $\bar{1}$ | $m_z$ | $m_v$ | $m_d$ | $\bar{4}_z$ | Irreducible representations                                                                                                         |
|-----------------------------------------------|----|-------|-------|----------|-------|-----------|-------|-------|-------|-------------|-------------------------------------------------------------------------------------------------------------------------------------|
| $\{\frac{1}{2}, \frac{1}{2}, 0\}^a$           | 4  | 0     | 0     | 2        | 0     | 0         | 4     | 0     | 2     | 0           | $M_1^+ \oplus M_4^+ \oplus M_5^-$                                                                                                   |
| $\{\frac{1}{2}, \frac{1}{2}, 1\}^b$           | 8  | 0     | 0     | 0        | 0     | 0         | 0     | 0     | 4     | 0           | $M_1^+ \oplus M_2^- \oplus M_3^- \oplus M_4^+ \oplus M_5^+ \oplus M_5^-$                                                            |
| $\{\frac{3}{2}, \frac{1}{2}, 0\}^c$           | 8  | 0     | 0     | 0        | 0     | 0         | 8     | 0     | 0     | 0           | $M_1^+ \oplus M_2^+ \oplus M_3^+ \oplus M_4^+ \oplus 2M_5^-$                                                                        |
| $\{\frac{3}{2}, \frac{1}{2}, 1\}^d$           | 16 | 0     | 0     | 0        | 0     | 0         | 0     | 0     | 0     | 0           | $M_1^+ \oplus M_1^- \oplus M_2^+ \oplus M_2^- \oplus M_3^+ \oplus M_3^-$<br>$\oplus M_4^+ \oplus M_4^- \oplus 2M_5^+ \oplus 2M_5^-$ |

- $^a \frac{a}{2\pi}\mathbf{G}$ 's are  $(0, 0, 0), (\bar{1}, 0, 0), (0, \bar{1}, 0), (\bar{1}, \bar{1}, 0)$ .
- $^b \frac{a}{2\pi}\mathbf{G}$ 's are  $(0, 0, 1), (\bar{1}, 0, 1), (0, \bar{1}, 1), (\bar{1}, \bar{1}, 1), (0, 0, \bar{1}), (\bar{1}, 0, \bar{1}), (0, \bar{1}, \bar{1}), (\bar{1}, \bar{1}, \bar{1})$ .
- $^c \frac{a}{2\pi}\mathbf{G}$ 's are  $(1, 0, 0), (\bar{2}, 0, 0), (1, \bar{1}, 0), (\bar{2}, \bar{1}, 0), (0, 1, 0), (0, \bar{2}, 0), (\bar{1}, 1, 0), (\bar{1}, \bar{2}, 0)$ .
- $^d \frac{a}{2\pi}\mathbf{G}$ 's are  $(1, 0, 1), (\bar{2}, 0, 1), (1, \bar{1}, 1), (\bar{2}, \bar{1}, 1), (0, 1, 1), (0, \bar{2}, 1), (\bar{1}, 1, 1), (\bar{1}, \bar{2}, 1), (1, 0, \bar{1}), (\bar{2}, 0, \bar{1}), (1, \bar{1}, \bar{1}), (\bar{2}, \bar{1}, \bar{1}), (0, 1, \bar{1}), (0, \bar{2}, \bar{1}), (\bar{1}, 1, \bar{1}), (\bar{1}, \bar{2}, \bar{1})$ .

Table S21: Equivalence representations of sets of plane waves  $e^{i(\mathbf{k}_R + \mathbf{G}) \cdot \mathbf{r}}$  for the group of the wavevector at an R point  $[\mathbf{k}_R = \frac{2\pi}{a}(\frac{1}{2}, \frac{1}{2}, \frac{1}{2})]$  of the space group #221, which transforms isomorphically to  $m\bar{3}m$  ( $O_h$ ). Plane waves are sorted by  $|\mathbf{k}_R + \mathbf{G}|$  and labeled by  $\frac{a}{2\pi}\{\mathbf{k}_R + \mathbf{G}\}$

| $\frac{a}{2\pi}\{\mathbf{k}_R + \mathbf{G}\}$ | 1  | 2 | 2' | 3 | 4 | $\bar{1}$ | $m$ | $m'$ | $\bar{3}$ | $\bar{4}$ | Irreducible representations                                                                                                        |
|-----------------------------------------------|----|---|----|---|---|-----------|-----|------|-----------|-----------|------------------------------------------------------------------------------------------------------------------------------------|
| $\{\frac{1}{2}, \frac{1}{2}, \frac{1}{2}\}^a$ | 8  | 0 | 0  | 2 | 0 | 0         | 0   | 4    | 0         | 0         | $R_1^+ \oplus R_2^- \oplus R_4^- \oplus R_5^+$                                                                                     |
| $\{\frac{3}{2}, \frac{1}{2}, \frac{1}{2}\}^b$ | 24 | 0 | 0  | 0 | 0 | 0         | 0   | 4    | 0         | 0         | $R_1^+ \oplus R_2^- \oplus R_3^+ \oplus R_3^- \oplus R_4^+ \oplus 2R_4^- \oplus 2R_5^+ \oplus R_5^-$                               |
| $\{\frac{3}{2}, \frac{3}{2}, \frac{1}{2}\}^c$ | 24 | 0 | 0  | 0 | 0 | 0         | 0   | 4    | 0         | 0         | $R_1^+ \oplus R_2^- \oplus R_3^+ \oplus R_3^- \oplus R_4^+ \oplus 2R_4^- \oplus 2R_5^+ \oplus R_5^-$                               |
| $\{\frac{3}{2}, \frac{3}{2}, \frac{3}{2}\}^d$ | 8  | 0 | 0  | 2 | 0 | 0         | 0   | 4    | 0         | 0         | $R_1^+ \oplus R_2^- \oplus R_4^- \oplus R_5^+$                                                                                     |
| $\{\frac{5}{2}, \frac{1}{2}, \frac{1}{2}\}^e$ | 24 | 0 | 0  | 0 | 0 | 0         | 0   | 4    | 0         | 0         | $R_1^+ \oplus R_2^- \oplus R_3^+ \oplus R_3^- \oplus R_4^+ \oplus 2R_4^- \oplus 2R_5^+ \oplus R_5^-$                               |
| $\{\frac{5}{2}, \frac{3}{2}, \frac{1}{2}\}^f$ | 48 | 0 | 0  | 0 | 0 | 0         | 0   | 0    | 0         | 0         | $R_1^+ \oplus R_1^- \oplus R_2^+ \oplus R_2^- \oplus 2R_3^+ \oplus 2R_3^- \oplus 3R_4^+ \oplus 3R_4^- \oplus 3R_5^+ \oplus 3R_5^-$ |

<sup>a</sup>  $\frac{a}{2\pi}\mathbf{G}$ 's are  $(0, 0, 0), (0, \bar{1}, 0), (0, 0, \bar{1}), (0, \bar{1}, \bar{1}), (\bar{1}, 0, 0), (\bar{1}, \bar{1}, 0), (\bar{1}, 0, \bar{1}), (\bar{1}, \bar{1}, \bar{1})$ .

<sup>b</sup>  $\frac{a}{2\pi}\mathbf{G}$ 's are

$(1, 0, 0), (1, \bar{1}, 0), (1, 0, \bar{1}), (1, \bar{1}, \bar{1}), (\bar{2}, 0, 0), (\bar{2}, \bar{1}, 0), (\bar{2}, 0, \bar{1}), (\bar{2}, \bar{1}, \bar{1}), (0, 1, 0), (\bar{1}, 1, 0), (0, 1, \bar{1}), (\bar{1}, 1, \bar{1}), (0, \bar{2}, 0), (\bar{1}, \bar{2}, 0), (0, \bar{2}, \bar{1}), (\bar{1}, \bar{2}, \bar{1}), (0, 0, 1), (0, \bar{1}, 1), (\bar{1}, 0, 1), (\bar{1}, \bar{1}, 1), (0, 0, \bar{2}), (0, \bar{1}, \bar{2}), (\bar{1}, 0, \bar{2}), (\bar{1}, \bar{1}, \bar{2})$ .

<sup>c</sup>  $\frac{a}{2\pi}\mathbf{G}$ 's are

$(1, 1, 0), (1, \bar{2}, 0), (1, 1, \bar{1}), (1, \bar{2}, \bar{1}), (\bar{2}, 1, 0), (\bar{2}, \bar{2}, 0), (\bar{2}, 1, \bar{1}), (\bar{2}, \bar{2}, \bar{1}), (1, 0, 1), (1, 0, \bar{2}), (1, \bar{1}, 1), (1, \bar{1}, \bar{2}), (\bar{2}, 0, 1), (\bar{2}, 0, \bar{2}), (\bar{2}, \bar{1}, 1), (\bar{2}, \bar{1}, \bar{2}), (0, 1, 1), (0, \bar{2}, 1), (\bar{1}, 1, 1), (\bar{1}, \bar{2}, 1), (0, 1, \bar{2}), (0, \bar{2}, \bar{2}), (\bar{1}, 1, \bar{2}), (\bar{1}, \bar{2}, \bar{2})$ .

<sup>d</sup>  $\frac{a}{2\pi}\mathbf{G}$ 's are  $(1, 1, 1), (1, \bar{2}, 1), (1, 1, \bar{2}), (1, \bar{2}, \bar{2}), (\bar{2}, 1, 1), (\bar{2}, \bar{2}, 1), (\bar{2}, 1, \bar{2}), (\bar{2}, \bar{2}, \bar{2})$ .

<sup>e</sup>  $\frac{a}{2\pi}\mathbf{G}$ 's are

$(2, 0, 0), (2, \bar{1}, 0), (2, 0, \bar{1}), (2, \bar{1}, \bar{1}), (\bar{3}, 0, 0), (\bar{3}, \bar{1}, 0), (\bar{3}, 0, \bar{1}), (\bar{3}, \bar{1}, \bar{1}), (0, 2, 0), (\bar{1}, 2, 0), (0, 2, \bar{1}), (\bar{1}, 2, \bar{1}), (0, \bar{3}, 0), (\bar{1}, \bar{3}, 0), (0, \bar{3}, \bar{1}), (\bar{1}, \bar{3}, \bar{1}), (0, 0, 2), (0, \bar{1}, 2), (\bar{1}, 0, 2), (\bar{1}, \bar{1}, 2), (0, 0, \bar{3}), (0, \bar{1}, \bar{3}), (\bar{1}, 0, \bar{3}), (\bar{1}, \bar{1}, \bar{3})$ .

<sup>f</sup>  $\frac{a}{2\pi}\mathbf{G}$ 's are

$(2, 1, 0), (2, \bar{2}, 0), (2, 1, \bar{1}), (2, \bar{2}, \bar{1}), (\bar{3}, 1, 0), (\bar{3}, \bar{2}, 0), (\bar{3}, 1, \bar{1}), (\bar{3}, \bar{2}, \bar{1}), (2, 0, 1), (2, 0, \bar{2}), (2, \bar{1}, 1), (2, \bar{1}, \bar{2}), (\bar{3}, 0, 1), (\bar{3}, 0, \bar{2}), (\bar{3}, \bar{1}, 1), (\bar{3}, \bar{1}, \bar{2}), (1, 2, 0), (\bar{2}, 2, 0), (1, 2, \bar{1}), (\bar{2}, 2, \bar{1}), (1, \bar{3}, 0), (\bar{2}, \bar{3}, 0), (1, \bar{3}, \bar{1}), (\bar{2}, \bar{3}, \bar{1}), (0, 2, 1), (0, 2, \bar{2}), (\bar{1}, 2, 1), (\bar{1}, 2, \bar{2}), (0, \bar{3}, 1), (0, \bar{3}, \bar{2}), (\bar{1}, \bar{3}, 1), (\bar{1}, \bar{3}, \bar{2}), (0, 1, 2), (0, \bar{2}, 2), (\bar{1}, 1, 2), (\bar{1}, \bar{2}, 2), (0, 1, \bar{3}), (0, \bar{2}, \bar{3}), (\bar{1}, 1, \bar{3}), (\bar{1}, \bar{2}, \bar{3}), (1, 0, 2), (\bar{2}, 0, 2), (1, \bar{1}, 2), (\bar{2}, \bar{1}, 2), (1, 0, \bar{3}), (\bar{2}, 0, \bar{3}), (1, \bar{1}, \bar{3}), (\bar{2}, \bar{1}, \bar{3})$ .

## References

- (S1) Aroyo, M. I.; Kirov, A.; Capillas, C.; Perez-Mato, J. M.; Wondratschek, H. Bilbao Crystallographic Server. II. Representations of crystallographic point groups and space groups. *Acta Crystallogr. Sec. A* **2006**, *62*, 115–128.
- (S2) Elcoro, L.; Bradlyn, B.; Wang, Z.; Vergniory, M. G.; Cano, J.; Felser, C.; Bernevig, B. A.; Orobengoa, D.; de la Flor, G.; Aroyo, M. I. Double crystallographic groups and their representations on the Bilbao Crystallographic Server. *J. Appl. Crystallogr.* **2017**, *50*, 1457–1477.
- (S3) Bouckaert, L. P.; Smoluchowski, R.; Wigner, E. Theory of Brillouin Zones and Symmetry Properties of Wave Functions in Crystals. *Phys. Rev.* **1936**, *50*, 58–67.
- (S4) Altmann, S. L.; Herzig, P. *Point-Group Theory Tables*, 2nd ed.; University of Vienna: Vienna, 2011.
- (S5) Dresselhaus, M. S.; Dresselhaus, G.; Jorio, A. *Group Theory*; Springer-Verlag: Berlin, Heidelberg, 2008.
